# Supplementary material
Source: PubMed Central journal article supplement (PMC2259049)
Supplement: plntphys_pp.107.114108_1.pdf [file plntphys_pp.107.114108_1.pdf]

**W22**

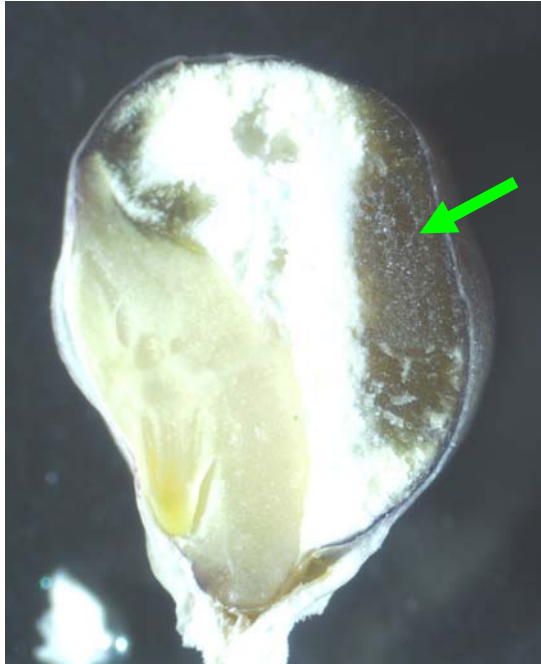

***wpk1-umu1***

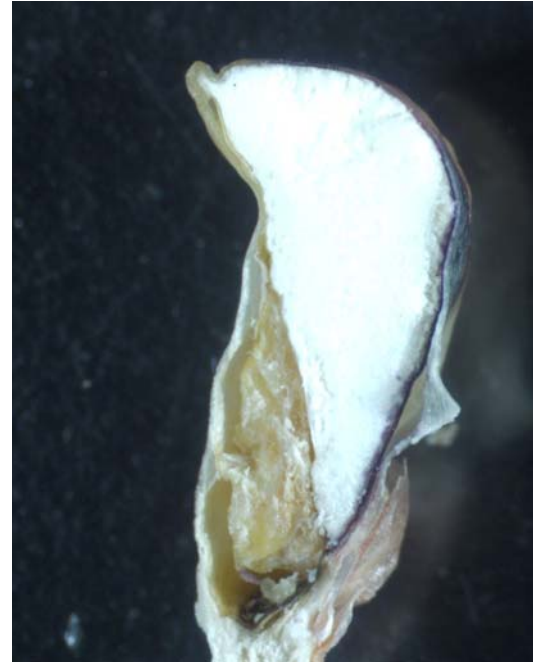

**Supplemental Figure 1.** Hand-section of dry mature kernel of *W22* and *wpk1-umu1*. Vitreous endosperm domain of *W22* seed, which is missing in the *wpk* mutant, is indicated by the arrow.
