# Supplementary material
Source: PubMed Central journal article supplement (PMC2259049)
Supplement: plntphys_pp.107.114108_2.pdf [file plntphys_pp.107.114108_2.pdf]

**W22**

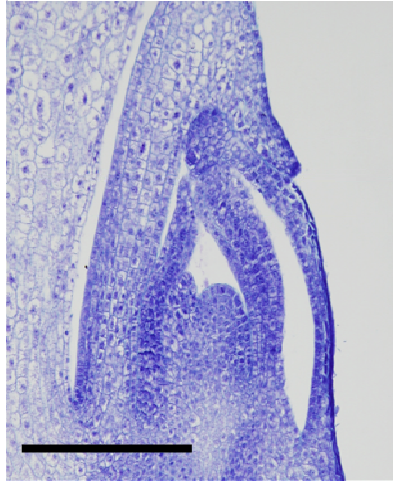

***wpk1-umu1***

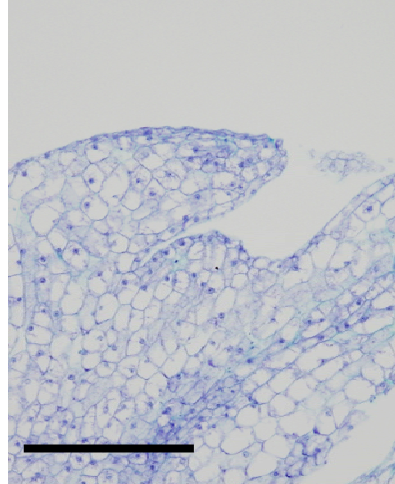

**Supplemental Figure 2.** Sections of SAM region in developing embryo at 12 DAP. Scale bars represent 200 $\mu$ m.
