# Supplementary material
Source: PubMed Central journal article supplement (PMC2259049)
Supplement: plntphys_pp.107.114108_3.pdf [file plntphys_pp.107.114108_3.pdf]

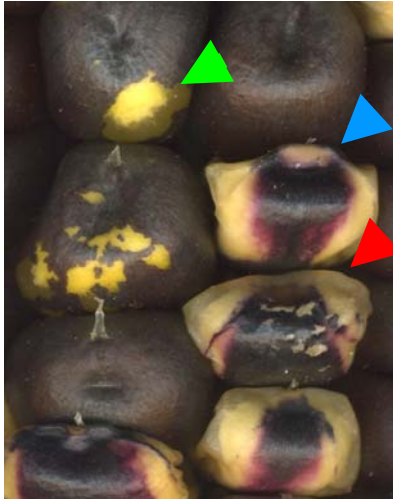

**Supplemental Figure 3.** Ear segregating *cr4* and *wpk1* mutants. The green, blue, and red arrows indicate *cr4*, *wpk1*, *cr4/wpk1* double mutant seeds, respectively.
