# Supplementary material
Source: PubMed Central journal article supplement (PMC2259049)
Supplement: plntphys_pp.107.114108_4.pdf [file plntphys_pp.107.114108_4.pdf]

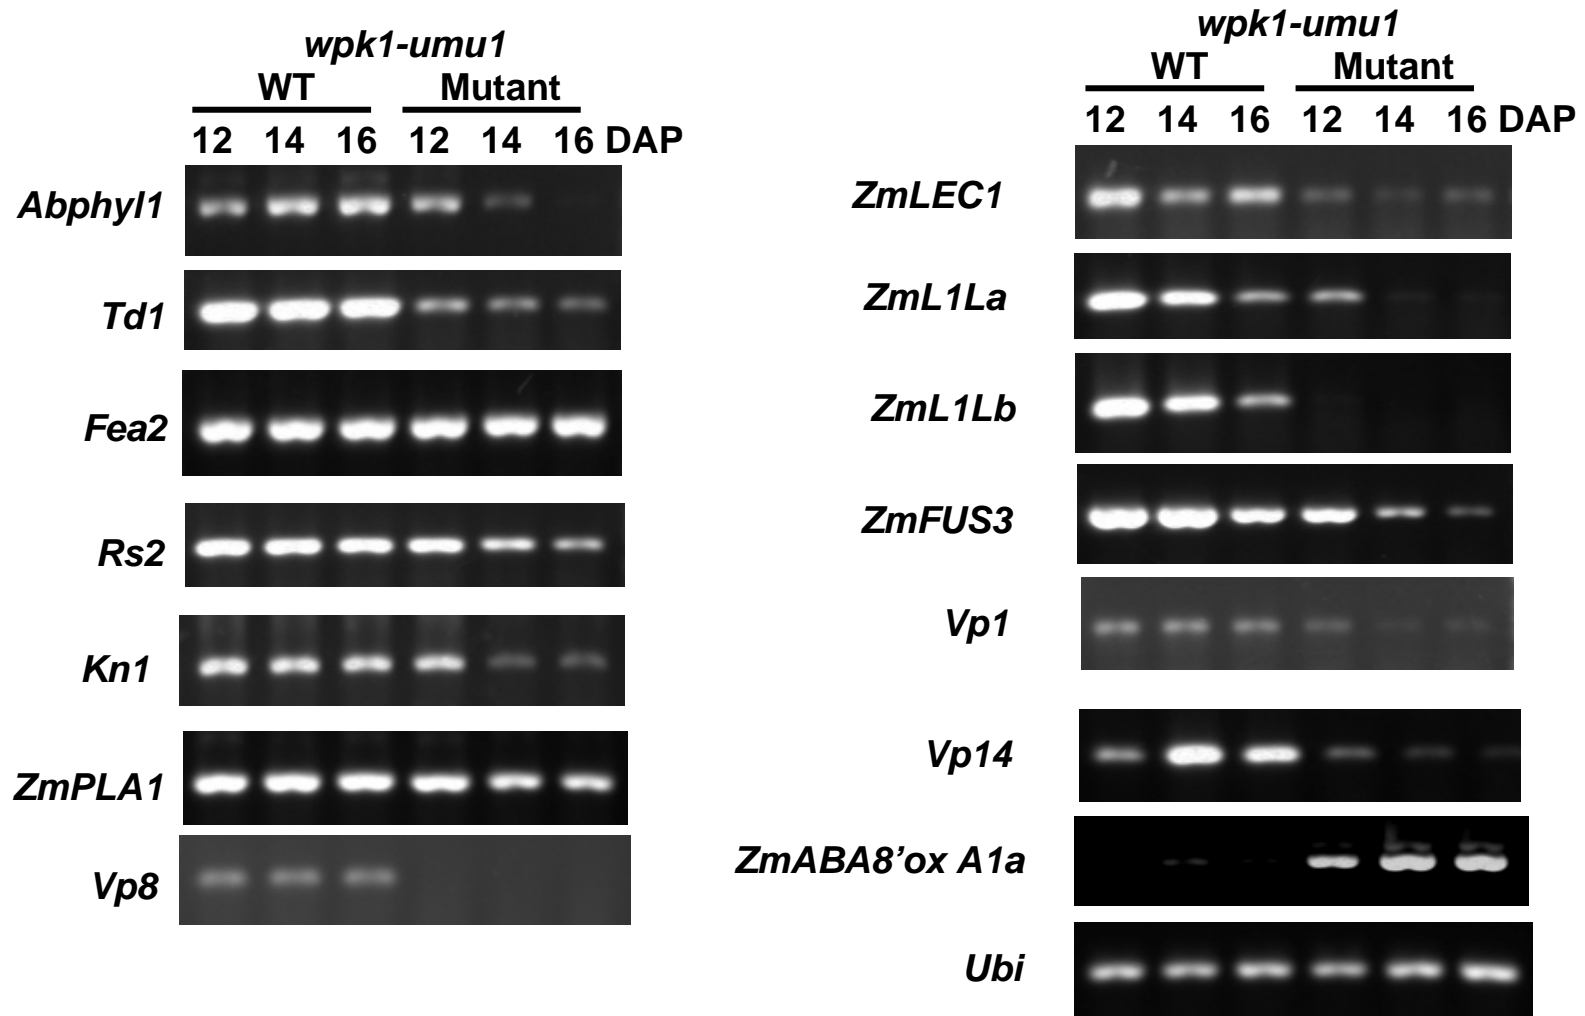

**Supplemental Figure 4.** RT-PCR analysis of meristem-related genes and embryo-expressed genes in *wpk1-umu1* (*vp8-umu1*) developing embryos. This is a completely independent set of expression analysis from results shown in Fig. 3, 5, 6, and 7.
