# Supplementary material
Source: PubMed Central journal article supplement (PMC2259049)
Supplement: plntphys_pp.107.114108_6.pdf [file plntphys_pp.107.114108_6.pdf]

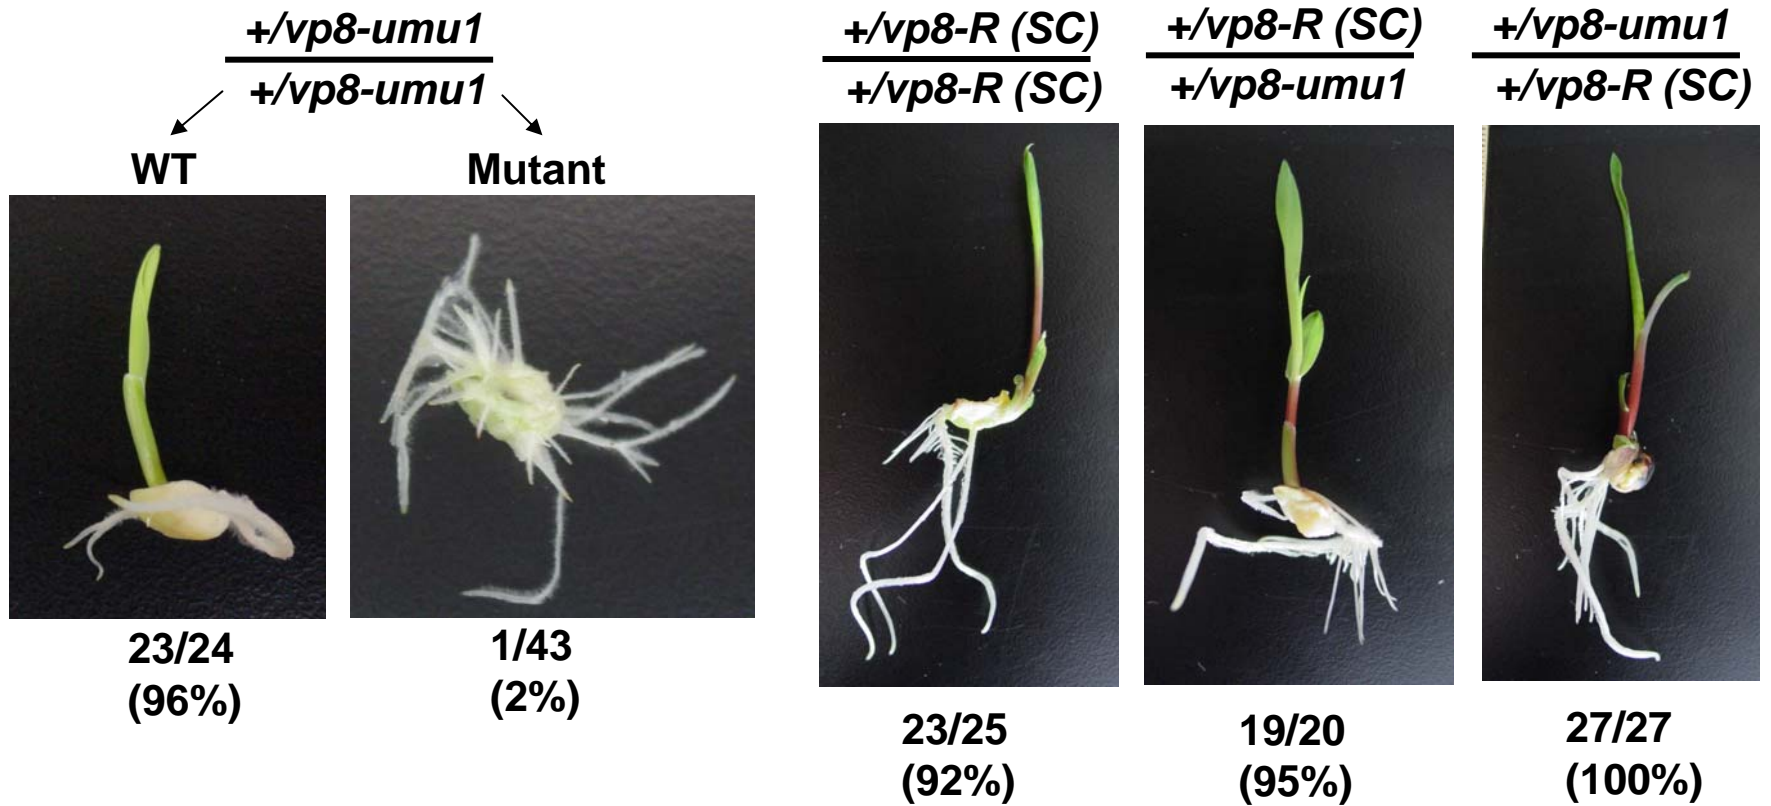

**Supplemental Figure 6.** Seedlings from rescued F1 embryos from crosses of *vp8-umu1* and *vp8-R* (SC). The developing embryos were rescued and grown on Murashige-Skoog agar media as described in Suzuki et al. (2006). The numbers and percentages of total seedlings with successful shoot formation are shown.
