# Supplementary material
Source: PubMed Central journal article supplement (PMC2259049)
Supplement: plntphys_pp.107.114108_7.pdf [file plntphys_pp.107.114108_7.pdf]

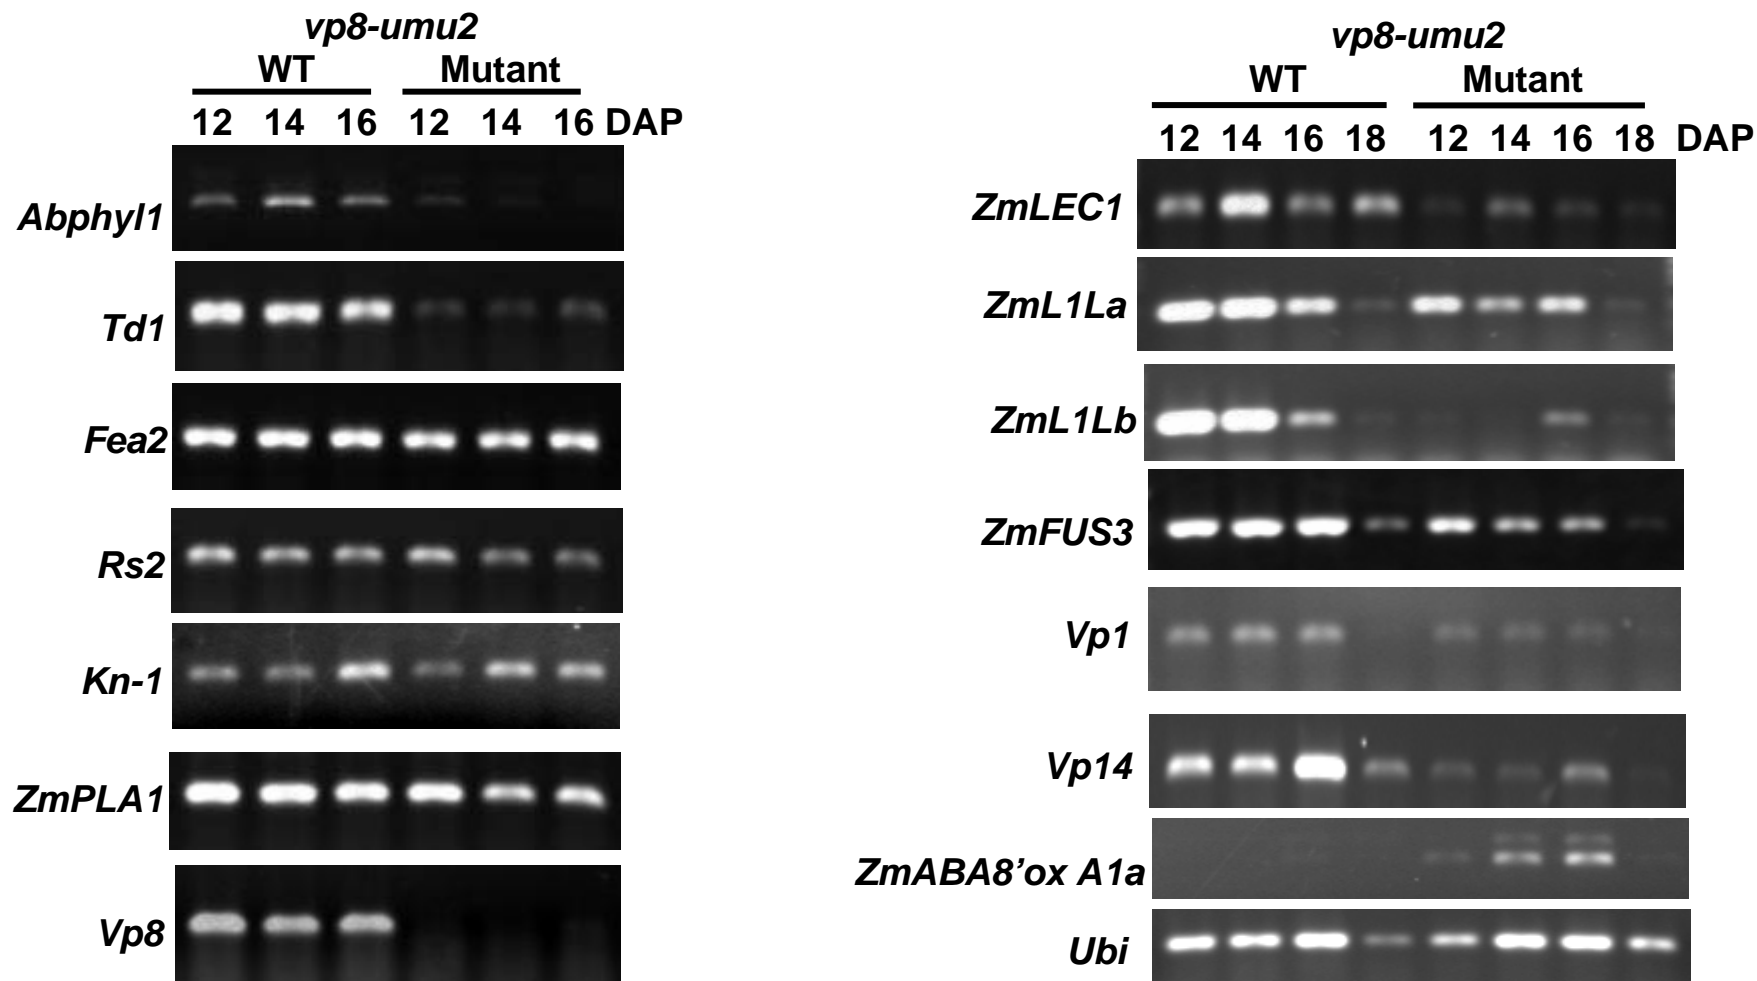

**Supplemental Figure 7.** RT-PCR analysis of meristem-related genes and embryo-expressed genes in *vp8-umu2* developing embryos. The RT-PCR reactions were performed simultaneously with the *vp8-umu1* embryos. Thus, the number of cycles in the RT-PCR reaction for each gene is identical to those shown in Fig. 3, 5, 6, and 7.
