# Supplementary material
Source: PubMed Central journal article supplement (PMC2259049)
Supplement: plntphys_pp.107.114108_8.pdf [file plntphys_pp.107.114108_8.pdf]

**Supplemental Table I.** Segregation of *wpk1-umu1* seeds from self pollinated heterozygous plants.

| Selfed ears               | Normal | Mutant |         | p-value            | Frequency of aborted<br>(% aborted/mutant) |
|---------------------------|--------|--------|---------|--------------------|--------------------------------------------|
|                           |        | wpk    | aborted |                    |                                            |
| 06F +/ <i>wpk1-umu1</i> a | 79     | 24     | 0       | 0.69               | 0                                          |
| 06F +/ <i>wpk1-umu1</i> b | 128    | 28     | 1       | 0.06               | 3.4                                        |
| 06F +/ <i>wpk1-umu1</i> c | 146    | 34     | 2       | 0.10               | 5.6                                        |
| 06F +/ <i>wpk1-umu1</i> d | 179    | 52     | 8       | 0.97               | 13.3                                       |
| 06F +/ <i>wpk1-umu1</i> e | 108    | 12     | 5       | 0.003              | 29.4                                       |
| 06S +/ <i>wpk1-umu1</i> a | 85     | 5      | 28      | 0.46               | 84.8                                       |
| 06S +/ <i>wpk1-umu1</i> b | 172    | 15     | 23      | 0.02               | 60.5                                       |
| 06S +/ <i>wpk1-umu1</i> c | 136    | 19     | 22      | 0.57               | 53.7                                       |
| 06S +/ <i>wpk1-umu1</i> d | 198    | 61     | 21      | 0.10               | 25.6                                       |
| 06S +/ <i>wpk1-umu1</i> e | 212    | 27     | 12      | $5 \times 10^{-4}$ | 30.8                                       |

wpk, typical *widow's peak* seeds shown in Figure 1A.

aborted, early-aborted seeds.

06F and 06S represent the 2006 fall and 2006 spring seasons, respectively.

$\chi^2$  test were conducted and shown as the p-values with assumption that normal and mutants (wpk+aborted) segregate 3:1.
